# Supplementary material for: Assimilation sensitivity of satellite-derived surface melt into the Regional Climate Model MAR: case study over the Antarctic Peninsula
Source: Copernicus journal article supplement (doi:10.5194/egusphere-2022-1371), 2022-12-15
Supplement: Supplementary file 1 [file egusphere-2022-1371-supplement.pdf]

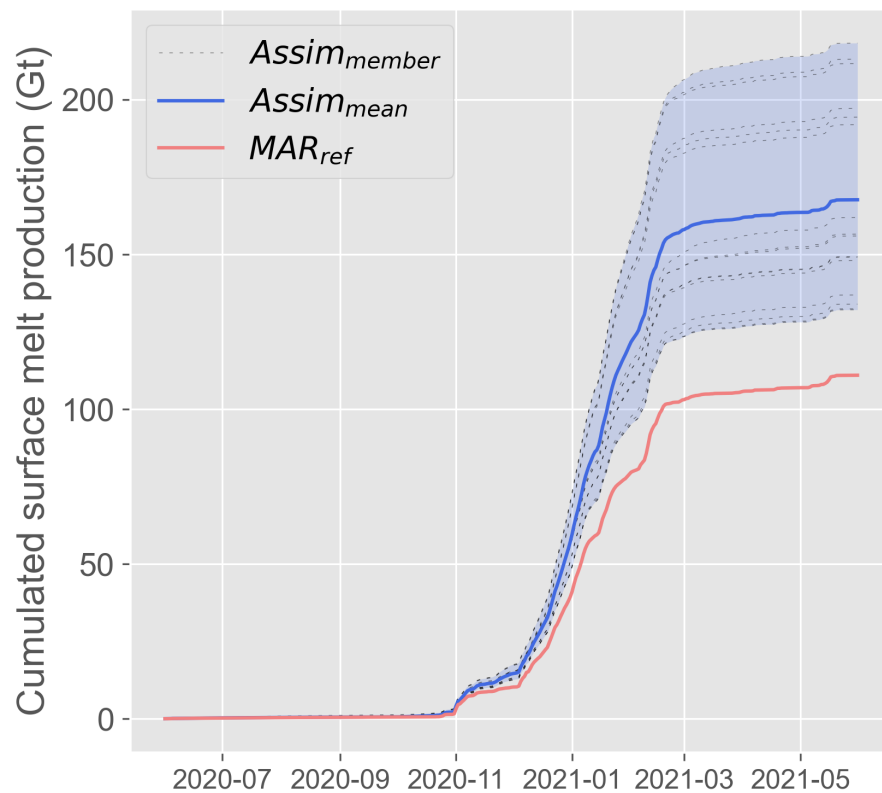

**Figure S 1.** Cumulated surface melt production (Gt) for the 2020-2021 melt season as modeled by MAR without assimilation ( $MAR_{ref}$  in light red), with data assimilation ( $Assim_{member}$  in dashed lines), and their averaged value ( $Assim_{mean}$  in blue). Shaded areas represent the range of the assimilations.

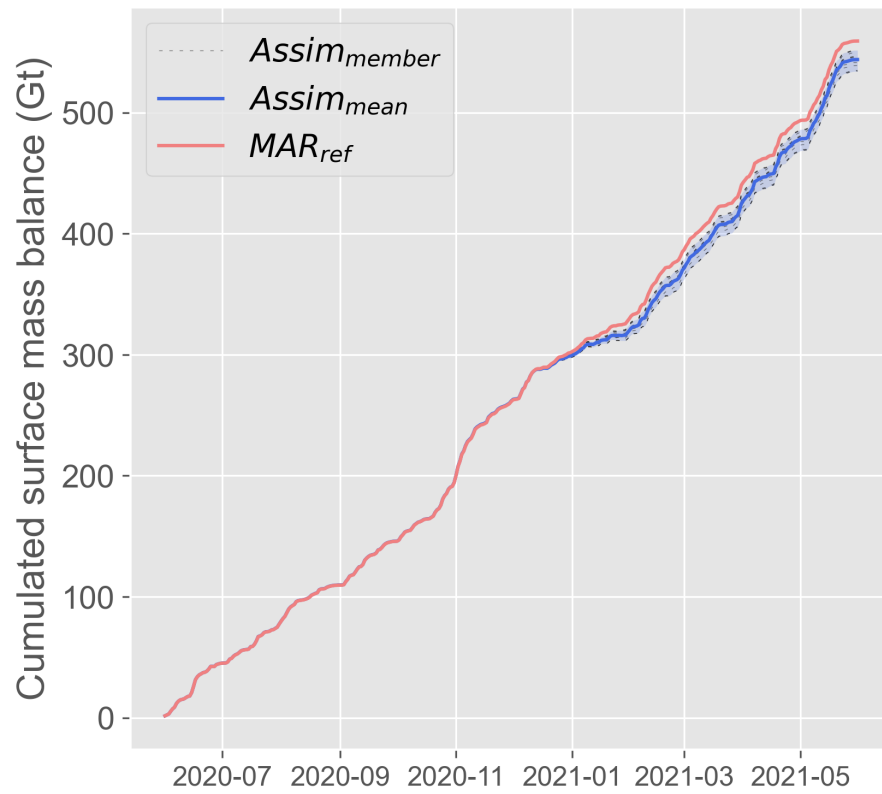

**Figure S 2.** Cumulated surface mass balance (Gt) for 2020-2021 melt season as modeled by MAR without assimilation ( $MAR_{ref}$  in red), with data assimilation ( $Assim_{member}$  in dashed lines), and their averaged value ( $Assim_{mean}$  in blue). Shaded areas represent the range of the assimilations.

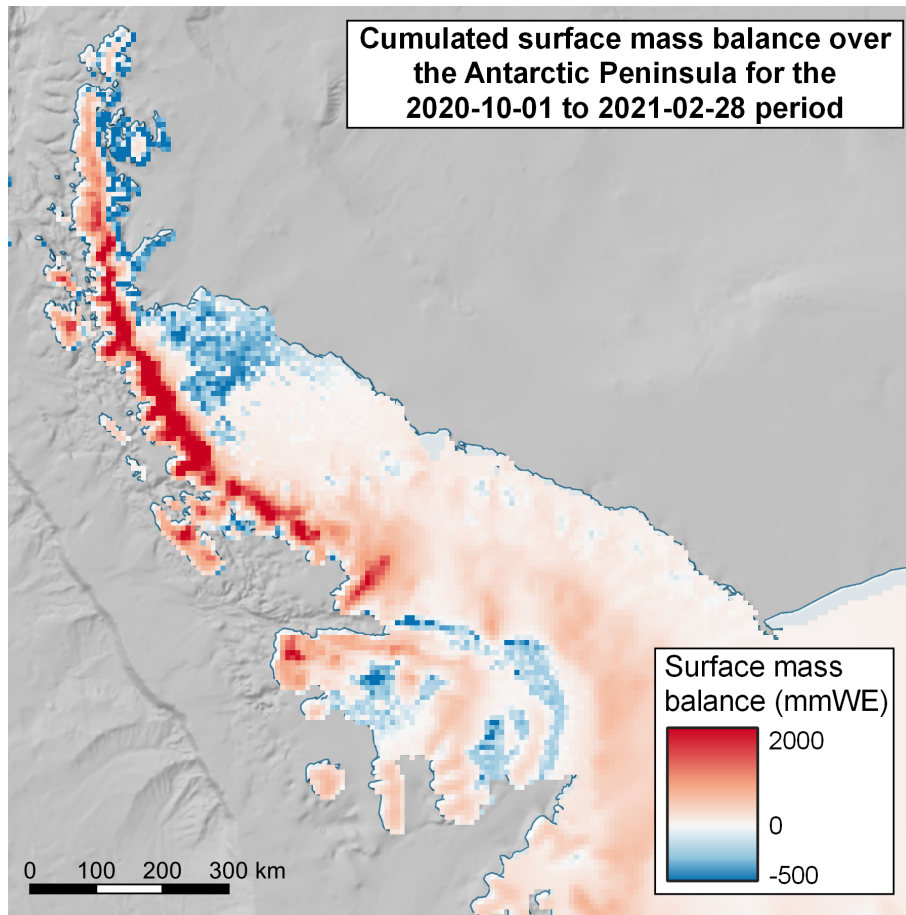

**Figure S 3.** Cumulated SMB (mmWE) from 2020-10-01 to 2021-02-28 over the AP as modeled by  $Assim_{ref}$ . Larsen C is outlined in purple, Georges VI in green, and Wilkins in red. The ice shelves and the northernmost coastlines are experiencing a decrease in SMB in opposition to the rest of the AP.

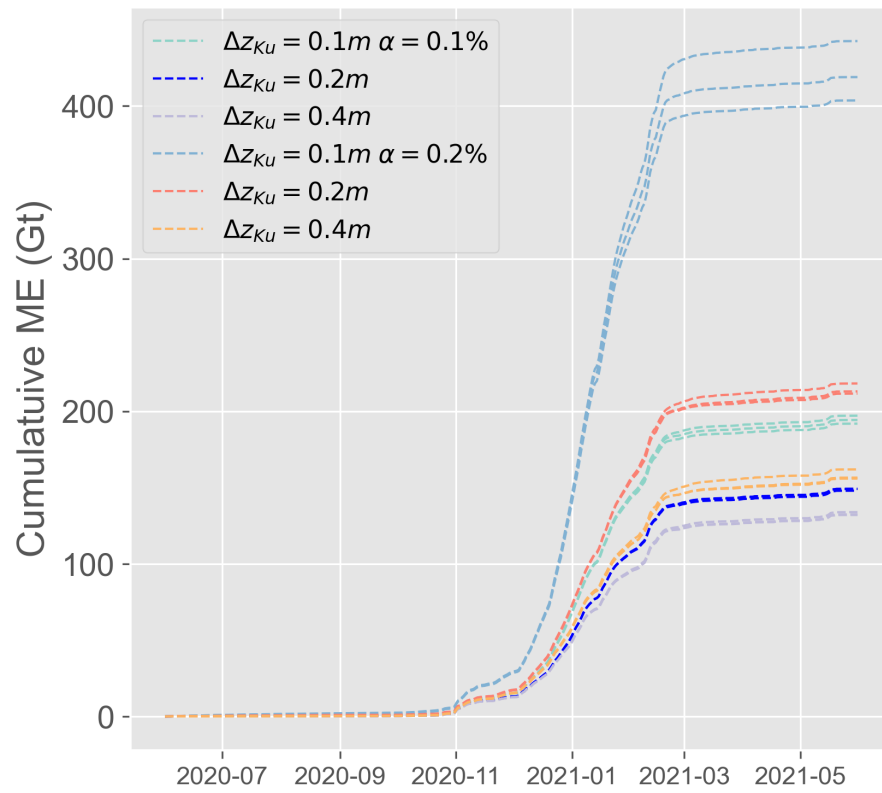

**Figure S 4.** Cumulated surface melt production (Gt) for 2020-2021 melt season as modeled by the different assimilation. Curves of the same color have different  $\Delta z$  for the C-band sensors.

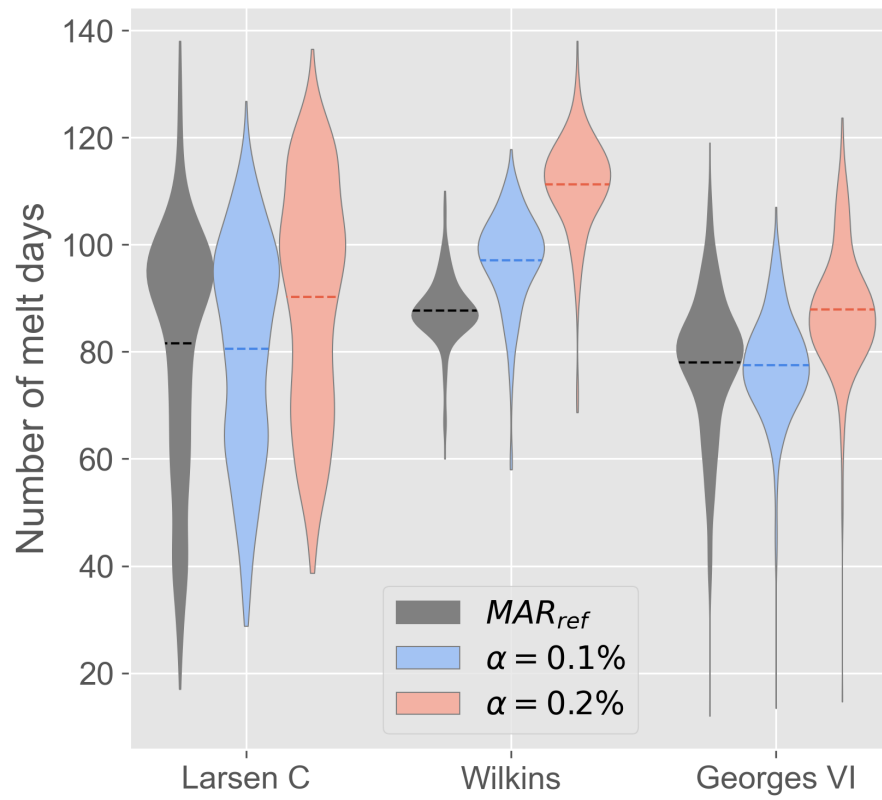

**Figure S 5.** Distribution of the number of melt days for the 2020-2021 melt season as modeled by  $MAR_{ref}$  and the assimilations for the two values of  $\alpha$  for the three studied ice shelves. Dashed lines represent the mean value of the distribution.

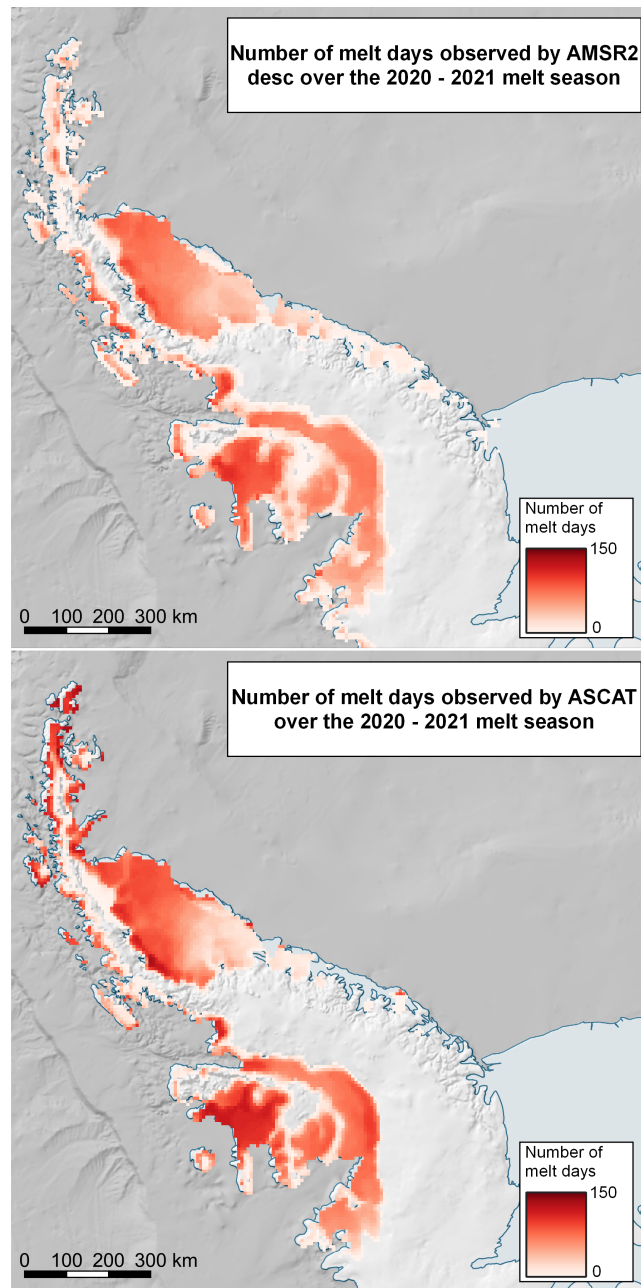

**Figure S 6.** a) Number of melt days observed by AMSR2 on the AP for the 2020-2021 melt season. b) Number of melt days observed by ASCAT on the AP for the 2019-2020 melt season.

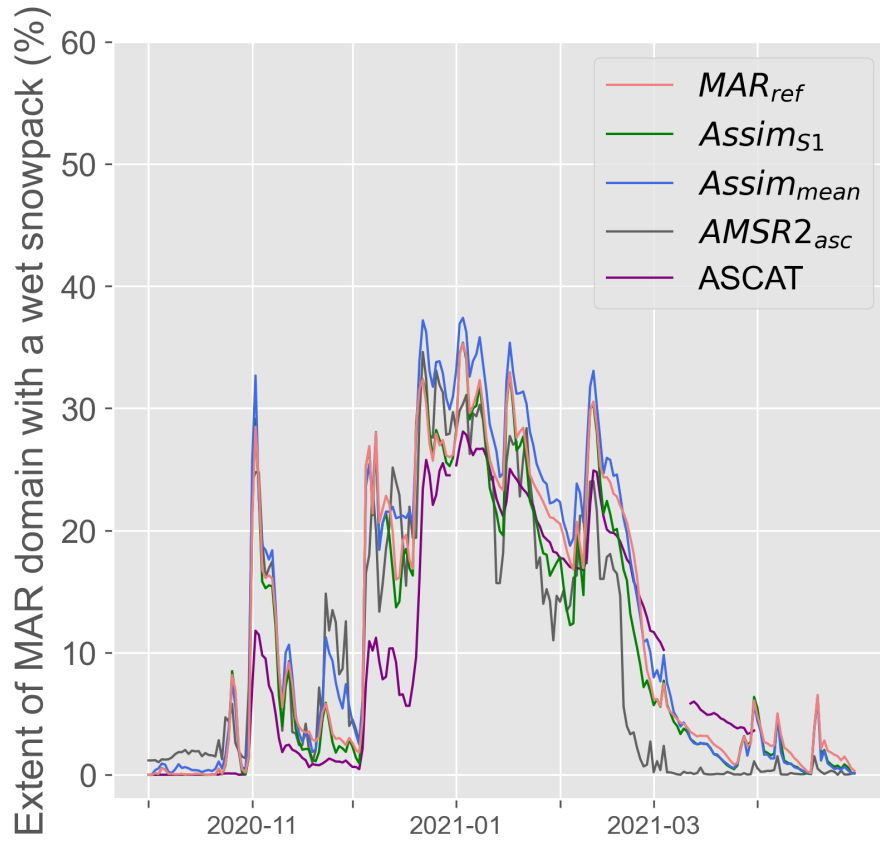

**Figure S 7.** Evolution of the surface melt extent during the 2020-2021 melt season as modeled by  $MAR_{ref}$  (in light red),  $Assim_{mean}$  (in blue), the assimilation of only S1 melt mask ( $Assim_{S1}$ , in green), and as observed by AMSR2 in ascending orbit (in grey), and by ASCAT (in purple).

**Table S 1.** Surface mass balance (SMB), and average snowpack density ( $\rho$ ) and snowpack liquid water content (LWC) for  $MAR_{ref}$ , the reference assimilation ( $Assim_{ref}$ ) and the mean value of the assimilations ( $Assim_{mean}$ ) over the Antarctic Peninsula for the 2020-2021 melt season. The range comprises all 19 assimilations. LWC and  $\rho$  are taken at a depth of 0.2 m and 1 m while the other variable are given as a snowpack cumulated value.

|                | ME (Gt yr <sup>-1</sup> ) | RU (Gt yr <sup>-1</sup> ) | SMB (Gt yr <sup>-1</sup> ) | $\rho_{0.2m}$ (kgm <sup>-3</sup> ) | $\rho_{1m}$ (kgm <sup>-3</sup> ) | $LWC_{0.2m}$ (kgkg <sup>-1</sup> ) | $LWC_{1m}$ (kgkg <sup>-1</sup> ) |
|----------------|---------------------------|---------------------------|----------------------------|------------------------------------|----------------------------------|------------------------------------|----------------------------------|
| $MAR_{ref}$    | 111                       | 36                        | 559                        | 429                                | 432                              | 0.003                              | 0.003                            |
| $Assim_{ref}$  | 149                       | 49                        | 546                        | 447                                | 450                              | 0.002                              | 0.003                            |
| $Assim_{mean}$ | 168                       | 52                        | 544                        | 448                                | 452                              | 0.002                              | 0.003                            |
| Range          | 132 - 218                 | 44 - 61                   | 534 - 551                  | 442 - 452                          | 446 - 457                        | 0.002 - 0.003                      | 0.002- 0.004                     |
| Evolution (%)  | 51.1                      | 43.7                      | -2.7                       | 4.3                                | 4.4                              | -17.8                              | -18                              |

**Table S 2.** Evolution of surface melt production (ME), runoff (Ru), surface mass balance (SMB), snowpack density ( $\rho$ ), and snowpack liquid water content (LWC) for  $MAR_{ref}$ , the reference assimilation ( $Assim_{ref}$ ) and the mean value of the assimilations ( $Assim_{mean}$ ) over the 3 studied ice shelves for the 2020-2021 melt season. LWC and  $\rho$  are given at a depth of 0.2 m and 1 m while the other variable are given as a snowpack average value.

| Larsen C       | ME (Gt yr <sup>-1</sup> ) | RU (Gt yr <sup>-1</sup> ) | SMB (Gt yr <sup>-1</sup> ) | $\rho_{0.2m}$ (kg m <sup>-3</sup> ) | $\rho_{1m}$ (kg m <sup>-3</sup> ) | $LWC_{0.2m}$ (kg kg <sup>-1</sup> ) | $LWC_{1m}$ (kg kg <sup>-1</sup> ) |
|----------------|---------------------------|---------------------------|----------------------------|-------------------------------------|-----------------------------------|-------------------------------------|-----------------------------------|
| MAR            | 30                        | 5.7                       | 20                         | 605                                 | 595                               | 0.0006                              | 0.0008                            |
| $Assim_{ref}$  | 41                        | 9.2                       | 16                         | 625                                 | 633                               | 0.0005                              | 0.0007                            |
| $Assim_{mean}$ | 47                        | 11                        | 14                         | 629                                 | 639                               | 0.0005                              | 0.0007                            |
| $\sigma$       | 11                        | 1.5                       | 1.1                        | 111                                 | 41                                | 0.0005                              | 0.0006                            |
| Wilkins        | ME (Gt yr <sup>-1</sup> ) | RU (Gt yr <sup>-1</sup> ) | SMB (Gt yr <sup>-1</sup> ) | $\rho_{0.2m}$ (kg m <sup>-3</sup> ) | $\rho_{1m}$ (kg m <sup>-3</sup> ) | $LWC_{0.2m}$ (kg kg <sup>-1</sup> ) | $LWC_{1m}$ (kg kg <sup>-1</sup> ) |
| MAR            | 5.9                       | 1.4                       | 5.8                        | 564                                 | 605                               | 0.0002                              | 0.0002                            |
| $Assim_{ref}$  | 8.6                       | 3.7                       | 3.5                        | 626                                 | 675                               | 0.0002                              | 0.0002                            |
| $Assim_{mean}$ | 10                        | 4.1                       | 3.1                        | 634                                 | 678                               | 0.0002                              | 0.0002                            |
| $\sigma$       | 2.7                       | 1.4                       | 1.4                        | 82                                  | 80                                | 0.0002                              | 0.0002                            |
| Georges VI     | ME (Gt yr <sup>-1</sup> ) | RU (Gt yr <sup>-1</sup> ) | SMB (Gt yr <sup>-1</sup> ) | $\rho_{0.2m}$ (kg m <sup>-3</sup> ) | $\rho_{1m}$ (kg m <sup>-3</sup> ) | $LWC_{0.2m}$ (kg kg <sup>-1</sup> ) | $LWC_{1m}$ (kg kg <sup>-1</sup> ) |
| MAR            | 10                        | 1.9                       | 11                         | 592                                 | 590                               | 0.0003                              | 0.0004                            |
| $Assim_{ref}$  | 13                        | 3.4                       | 10                         | 624                                 | 627                               | 0.0003                              | 0.0004                            |
| $Assim_{mean}$ | 15                        | 3.5                       | 10                         | 620                                 | 621                               | 0.0003                              | 0.0004                            |
| $\sigma$       | 3.2                       | 3.5                       | 0.7                        | 87                                  | 66                                | 0.0003                              | 0.0003                            |

**Table S 3.** Comparison between the melt season length and number of melt days modeled for the three studied ice shelves for  $MAR_{ref}$  and the assimilations for the 2020-2021 melt season.

| Larsen C          | Melt season length (days) | Number of melt days modeled |
|-------------------|---------------------------|-----------------------------|
| $MAR_{ref}$       | 209                       | 113                         |
| $\alpha = 0.1 \%$ | 208                       | 116                         |
| $\alpha = 0.2 \%$ | 209                       | 127                         |
| Wilkins           | Melt season length (days) | Number of melt days modeled |
| $MAR_{ref}$       | 200                       | 99                          |
| $\alpha = 0.1 \%$ | 201                       | 119                         |
| $\alpha = 0.2 \%$ | 207                       | 132                         |
| Georges VI        | Melt season length (days) | Number of melt days modeled |
| $MAR_{ref}$       | 200                       | 98                          |
| $\alpha = 0.1 \%$ | 200                       | 95                          |
| $\alpha = 0.2 \%$ | 200                       | 113                         |
